# Supplementary material for: Significance of hydrogen bonding networks in the proton-coupled electron transfer reactions of photosystem II from a quantum-mechanics perspective
Source: Royal Society of Chemistry journal article supplement (doi:10.1039/c9cp00868c), 2019-01-01
Supplement: c9cp00868c1.pdf [file c9cp00868c1.pdf]

## Supporting Information

### “Significance of Hydrogen Bonding Network in the Proton-Coupled Electron Transfer Reactions of Photosystem II from a Quantum-Mechanical Perspective”

Jun Chai,<sup>a</sup> Zhaoyang Zheng,<sup>b</sup> Hui Pan,<sup>c</sup> Shengbai Zhang,<sup>d</sup> K. V. Lakshmi<sup>\*,e</sup> and Yi-Yang Sun<sup>\*,a</sup>

<sup>a</sup>State Key Laboratory of High Performance Ceramics and Superfine Microstructure, Shanghai Institute of Ceramics, Chinese Academy of Sciences, Shanghai 201899, China.

<sup>b</sup>National Key Laboratory of Shock Wave and Detonation Physics, Institute of Fluid Physics, China Academy of Engineering Physics, Mianyang 621900, China.

<sup>c</sup>Joint Key Laboratory of the Ministry of Education, Institute of Applied Physics and Materials Engineering, University of Macau, Taipa, Macao SAR 999078, China.

<sup>d</sup>Department of Physics, Applied Physics, and Astronomy, Rensselaer Polytechnic Institute, Troy, NY, 12180, USA.

<sup>e</sup>Department of Chemistry and Chemical Biology and The Baruch '60 Center for Biochemical Solar Energy Research, Rensselaer Polytechnic Institute, Troy, NY, 12180, USA. Email: lakshk@rpi.edu

Contact information:

yysun@mail.sic.ac.cn (Y.-Y.S.), lakshk@rpi.edu (K.V.L.)

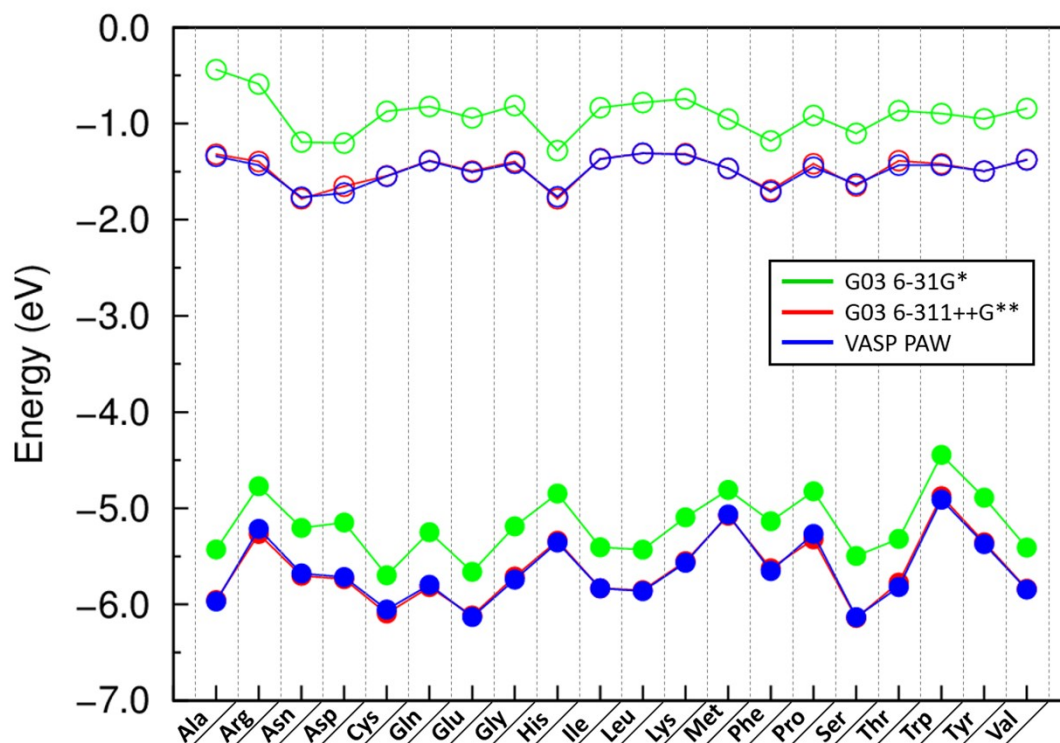

**Figure S1.** Comparison of calculated HOMO (filled circles) and LUMO (open circles) positions of 20 proteinogenic amino acid molecules with respect to the vacuum level using the plane-wave PAW potential method by VASP and the localized Gaussian basis sets by Gaussian03 [1]. A small (6-31G\*) and large converged (6-311++G\*\*) Gaussian basis set are used in the comparison. The VASP results are in excellent agreement with those from the large 6-311++G\*\* basis set.

Reference:

[1] Gaussian 03, Revision E.01, M. J. Frisch, G. W. Trucks, H. B. Schlegel, G. E. Scuseria, M. A. Robb, J. R. Cheeseman, J. A. Montgomery, Jr., T. Vreven, K. N. Kudin, J. C. Burant, J. M. Millam, S. S. Iyengar, J. Tomasi, V. Barone, B. Mennucci, M. Cossi, G. Scalmani, N. Rega, G. A. Petersson, H. Nakatsuji, M. Hada, M. Ehara, K. Toyota, R. Fukuda, J. Hasegawa, M. Ishida, T. Nakajima, Y. Honda, O. Kitao, H. Nakai, M. Klene, X. Li, J. E. Knox, H. P. Hratchian, J. B. Cross, V. Bakken, C. Adamo, J. Jaramillo, R. Gomperts, R. E. Stratmann, O. Yazyev, A. J. Austin, R. Cammi, C. Pomelli, J. W. Ochterski, P. Y. Ayala, K. Morokuma, G. A. Voth, P. Salvador, J. J. Dannenberg, V. G. Zakrzewski, S. Dapprich, A. D. Daniels, M. C. Strain, O. Farkas, D. K. Malick, A. D. Rabuck, K. Raghavachari, J. B. Foresman, J. V. Ortiz, Q. Cui, A. G. Baboul, S. Clifford, J. Cioslowski, B. B. Stefanov, G. Liu, A. Liashenko, P. Piskorz, I. Komaromi, R. L. Martin, D. J. Fox, T. Keith, M. A. Al-Laham, C. Y. Peng, A. Nanayakkara, M. Challacombe, P. M. W. Gill, B. Johnson, W. Chen, M. W. Wong, C. Gonzalez, and J. A. Pople, Gaussian, Inc., Wallingford CT, 2004.
